# Supplementary material
Source: MDPI journal article supplement (https://www.mdpi.com/1999-4907/9/4/204)
Supplement: s1 [file s1]

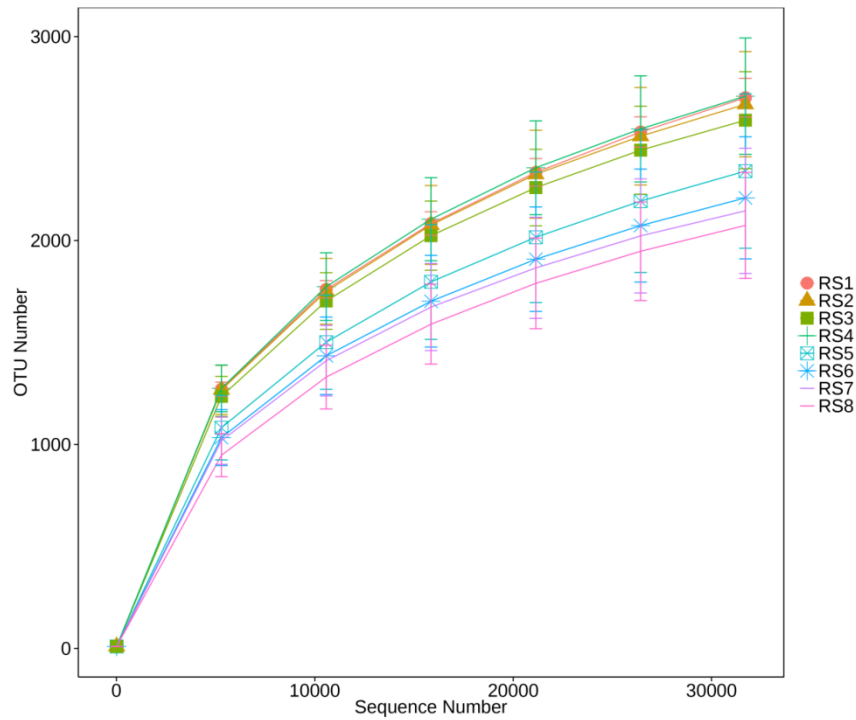

**Figure S1.** Rarefaction curves obtained for the HiSeq sequencing reads of operational taxonomic units (OTUs) from the V3–V4 region of bacterial 16S *rDNA* genes in soil samples collected at the two different forest sites. Rarefaction curves at a cutoff level of 3% were constructed at a 97% sequence similarity cutoff value in mothur (<http://www.mothur.org/>). RS1, RS2, RS3, RS4 represent September and December 2015 and March and June 2016 at TBDF-BTM, respectively. RS5, RS6, RS7, and RS8 represent September and December 2015 and March and June 2016 at TRF-JFL, respectively.
